# Supplementary material
Source: PubMed Central journal article supplement (PMC3801421)
Supplement: NIHMS509807-supplement-02.pdf [file NIHMS509807-supplement-02.pdf]

## SUPPLEMENTAL TABLE

| Parameter                                  | ArcGFP- BAC<br>(Brief experience) |                   | Heterozygous ArcGFP-<br>KI <sup>+/-</sup> |                | ArcGFP-KI <sup>-/-</sup><br>(ArcKO) | ArcGFP- BAC<br>(Repeated<br>Experience) |                      |
|--------------------------------------------|-----------------------------------|-------------------|-------------------------------------------|----------------|-------------------------------------|-----------------------------------------|----------------------|
|                                            | ArcGFP+<br>n = 10                 | ArcGFP-<br>n = 10 | ArcGFP+<br>n = 8                          | ArcGFP+<br>n=8 | ArcGFP+                             | ArcGFP+<br>(n=10-18)                    | ArcGFP-<br>(n=10-18) |
| mEPSC decay time constant (ms)             | 7.4 ± 0.4                         | 7.5 ± 0.4         | 6.4 ± 0.4                                 | 6.5 ± 0.3      | 6 ± 0.7                             | 6.6 ± 0.5                               | 7.2 ± 0.6            |
| Evoked EPSC decay time constant (ms), n=11 | 31.3± 2.1                         | 35.1 ± 2.1        | n.d.                                      | n.d.           | n.d.                                | n.d.                                    | n.d.                 |
| Resting membrane potential (mV)            | -52 ± 3                           | -55 ± 2           | -58 ± 2                                   | -60 ± 2        | -55 ± 2                             | -56 ± 2                                 | -57 ± 1              |
| Input Resistance (MΩ)                      | 313 ± 34                          | 284 ± 24          | 317 ± 36                                  | 361 ± 61       | 330 ± 26                            | 323 ± 22                                | 331 ± 38             |
| Whole-cell capacitance (pF)                | 24 ± 2                            | 25 ± 2            | 32 ± 2                                    | 30 ± 3         | 27 ± 1                              | 27±1                                    | 26±1                 |
| Series resistance (MΩ)                     | 23 ± 2                            | 20 ± 2            | 20 ± 2                                    | 17 ± 1         | 21 ± 2                              | 23 ± 2                                  | 22 ± 2               |

**Table S1.** Electrophysiological properties of ArcGFP+ and ArcGFP- neurons from novelty-exposed ArcGFP reporter mice (ArcGFP-BAC, heterozygous ArcGFP-KI<sup>+/-</sup> and homozygous ArcGFP-KI<sup>-/-</sup> (ArcKO)) were not different. Values represent mean ± SEM. n.d. = not determined. In ArcGFP-BAC mice simultaneous recordings from ArcGFP+ and ArcGFP- neurons were performed. In heterozygous ArcGFP-KI<sup>+/-</sup> mice consecutive recordings from neighboring ArcGFP+ and ArcGFP- neurons from the same slice were used. Electrophysiological properties of ArcGFP+ and ArcGFP- neurons are similar for ArcGFP-BAC mice exposed to multiple repeated experiences of the same environment. For each parameter tested in the repeated experience group, three ArcGFP+ and ArcGFP- pairs involved consecutive recordings from neighbor cells. All other recordings were simultaneous and from neighbor ArcGFP+ and ArcGFP- neurons. There was also no difference in passive electrophysiological properties for Arc-activated cells between brief and repeated experience groups in ArcGFP-BAC mice.
